# Supplementary material
Source: ML conference proceedings conference paper supplement (https://openaccess.thecvf.com/content/CVPR2022/html/Zhang_Learning_To_Restore_CVPR_2022_paper.html)
Supplement: Supplementary file 1 [file Zhang_Learning_To_Restore_CVPR_2022_supplemental.pdf]

# Supplementary Material of Paper 5664

Anonymous CVPR submission

Paper ID 5664

## 1. Implementation Details

Here we describe more details of the model implementation. As introduced in Section 3, the 3D proxy provides depth, texture, and also light/viewpoint predicted from  $\Phi^l, \Phi^\omega$ , respectively. During the learning procedure of ARN and GRN, we directly use the  $l_o, \omega_o$  from pre-trained  $\Phi^l, \Phi^\omega$  proxy for rendering. Then, we jointly train  $\Phi^l, \Phi^\omega$  with ARN and GRN in the final mutual learning process.

For the lighting  $\Lambda$  and rasterization  $\Pi$  operation used in Eqns. (1) and (2), we follow a same setting as Unsup3D [6]. Here we provide more details. The lighting  $\Lambda$  is conducted at the canonical view, where we shade the canonical albedo  $a$  with the predicted light  $l$  by the Lambertian function  $f_{lam}$ . Concretely, we first transform the predicted canonical depth  $d$  to the normal  $n$ , then perform  $S = f_{lam}(n, l)$  to get a shading map  $S$ . Finally, the canonical texture  $t$  is obtained by  $t = S \odot a$ . For the rasterization  $\Pi$  function, we set the Field of View (FOV) of the camera as  $10^\circ$  to calculate the camera matrix. The corresponding projection and warping operations is implemented by neural mesh renderer [4].

## 2. Details of the Experiment on MICC

In Fig. 1 of the main paper, we perform a cross-view geometry analysis on MICC [1] dataset. MICC is a 3D face dataset containing 53 subjects with its ground truth 3D mesh acquired from a structured light scanning system. Similar to [3], we render a provided face to  $-45^\circ, 0^\circ$ , and  $+45^\circ$  respectively, each of which contains 3 rendered faces. To evaluate the performance of cross-view geometry modelling, we use the image of one pose for reconstruction and measure the modelled geometry on the other two poses. For instance, we first use the image of  $0^\circ$  as input to recover the geometry, and then calculate the errors with ground truth geometry of  $-45^\circ$  and  $+45^\circ$ , respectively. The errors are then averaged as the final result. In the experiment, we evaluate our method, Unsup3D [6] and LAP [7], each of which is directly tested on MICC using the pre-trained weights without fine-tuning.

We further show examples in Fig. 1. As illustrated, our method models better facial geometry and organ shapes,

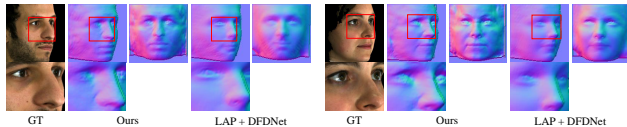

Figure 1. Visual comparison on MICC dataset.

while LAP [7] cannot precisely recover the corresponding face structure.

## 3. More Results

In Fig. 2, we show more results and comparisons with the state-of-the-art methods. Our method predicts finer details and more precise facial shapes against the degraded images.

## References

- [1] Andrew D Bagdanov, Alberto Del Bimbo, and Iacopo Masi. The florence 2d/3d hybrid face dataset. In *Proceedings of the 2011 joint ACM workshop on Human gesture and behavior understanding*, pages 79–80, 2011. 1
- [2] Yao Feng, Haiwen Feng, Michael J Black, and Timo Bolkart. Learning an animatable detailed 3d face model from in-the-wild images. *ACM Transactions on Graphics (TOG)*, 40(4):1–13, 2021. 2
- [3] Jianzhu Guo, Xiangyu Zhu, Yang Yang, Fan Yang, Zhen Lei, and Stan Z Li. Towards fast, accurate and stable 3d dense face alignment. In *ECCV*, 2020. 1
- [4] Hiroharu Kato, Yoshitaka Ushiku, and Tatsuya Harada. Neural 3d mesh renderer. In *CVPR*, pages 3907–3916, 2018. 1
- [5] Xiaoming Li, Chaofeng Chen, Shangchen Zhou, Xianhui Lin, Wangmeng Zuo, and Lei Zhang. Blind face restoration via deep multi-scale component dictionaries. In *European Conference on Computer Vision*, pages 399–415, 2020. 2
- [6] Shangzhe Wu, Christian Rupprecht, and Andrea Vedaldi. Unsupervised learning of probably symmetric deformable 3d objects from images in the wild. In *CVPR*, pages 1–10, 2020. 1, 2
- [7] Zhenyu Zhang, Yanhao Ge, Renwang Chen, Ying Tai, Yan Yan, Jian Yang, Chengjie Wang, Jilin Li, and Feiyue Huang. Learning to aggregate and personalize 3d face from in-the-wild photo collection. In *CVPR*, pages 14214–14224, 2021. 1, 2

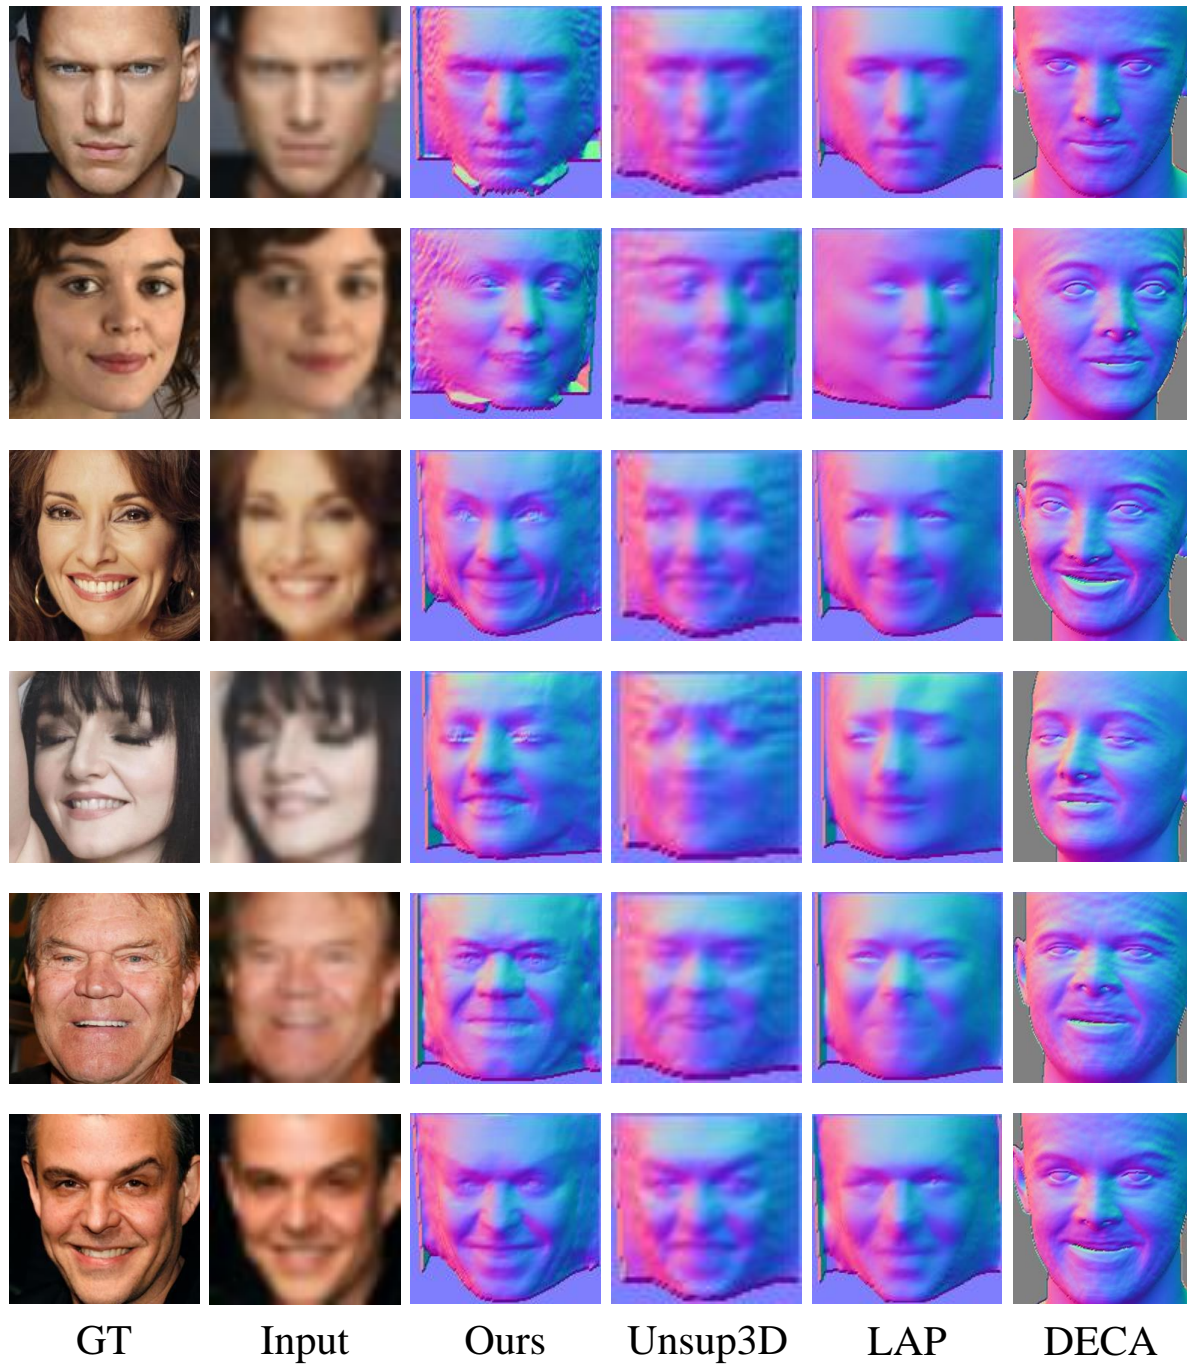

Figure 2. More comparisons with Unsup3D [6], LAP [7] and DECA [2]. Our method uses the low-resolution input, while other approaches leverage DFDNet [5] to pre-process the input.
